# Supplementary material
Source: bioRxiv or medRxiv preprint supplement (https://www.biorxiv.org/content/biorxiv/early/2019/11/01/827741/DC1/embed/media-1.pdf)
Supplement: Supplementary file [file media-1.pdf]

Supplementary from Davidson et al “Diet-induced changes to host gut microbiota are linked to foraging innovation in a wild bird”.

Table S1. Estimated nutritional content of food types provided in dietary treatments. Percentages of protein, fat and fibre content attained from online resources.

| Food             | Protein | Fat    | Fibre |
|------------------|---------|--------|-------|
| mealworm larvae  | 18.70%  | 13.40% | 2.50% |
| waxworm larvae   | 14.10%  | 24.90% | 3.40% |
| peanuts          | 25.80%  | 49.20% | 8.50% |
| sunflower hearts | 18.33%  | 46.67% | 10%   |

Table S2. GLMM outputs from models testing dietary effects on problem solving performance and gut microbiome

| Model                           | subjects      | total observations | Fixed effects | $\beta \pm SE$      | z/t       | p            |             |
|---------------------------------|---------------|--------------------|---------------|---------------------|-----------|--------------|-------------|
| <b>Diet on PSP</b>              | 36            | 71                 | intercept     | 0.88±0.52           | -1.70     | 0.09         |             |
|                                 | Minimal model | 36                 | 71            | seed diet           | 1.43±0.66 | <b>2.20</b>  | <b>0.03</b> |
|                                 |               | 36                 | 71            | age (adult)         | 1.32±0.68 | -1.93        | 0.053       |
|                                 | dropped terms | 36                 | 71            | experiment day      | 1.23±0.64 | -1.93        | 0.054       |
|                                 |               | 36                 | 71            | sex (male)          | 0.20±0.68 | -0.30        | 0.76        |
|                                 |               | 36                 | 71            | habitat             | 0.06±0.59 | -0.10        | 0.92        |
|                                 |               | 36                 | 71            | diet*habitat        | 1.09±1.22 | 0.89         | 0.37        |
|                                 |               | 36                 | 71            | diet*experiment day | 17.6±1445 | 0.01         | 0.99        |
| <b>Diet on Chao1</b>            | 36            | 61                 | intercept     | 18.5±0.70           | 26.54     | 0.00         |             |
|                                 | Minimal model | 36                 | 61            | insect diet         | 3.44±1.37 | <b>-2.51</b> | <b>0.02</b> |
|                                 |               | 36                 | 61            | seed diet           | 0.09±1.30 | 0.07         | 0.94        |
|                                 | dropped terms | 36                 | 61            | habitat (urban)     | 0.67±1.90 | 0.61         | 0.55        |
|                                 |               | 36                 | 61            | sex (male)          | 0.45±1.08 | -0.41        | 0.68        |
|                                 |               | 36                 | 61            | age (adult)         | 0.34±1.10 | -0.31        | 0.75        |
|                                 | 36            | 61                 | diet*habitat  | 3.07±2.11           | 1.45      | 0.16         |             |
| <b>Diet on Shannon's index</b>  | 36            | 61                 | intercept     | 2.93±0.20           | 14.75     | 0.00         |             |
|                                 | Minimal model | 36                 | 61            | insect diet         | 0.75±0.37 | -2.02        | 0.06        |
|                                 |               | 36                 | 61            | seed diet           | 0.01±0.35 | 0.01         | 0.99        |
|                                 | dropped terms | 36                 | 61            | habitat (urban)     | 0.14±0.33 | -0.42        | 0.68        |
|                                 |               | 36                 | 61            | sex (male)          | 0.22±0.32 | 0.67         | 0.51        |
|                                 |               | 36                 | 61            | age (adult)         | 0.01±0.33 | 0.02         | 0.98        |
|                                 | 36            | 61                 | diet*habitat  | 0.92±0.64           | 1.44      | 0.16         |             |
| <b>Diet on observed species</b> | 36            | 61                 | intercept     | 5.5±0.01            | 58.80     | 0.00         |             |
|                                 | Minimal model | 36                 | 61            | insect diet         | 0.32±0.19 | -1.74        | 0.095       |
|                                 |               | 36                 | 61            | seed diet           | 0.08±0.18 | 0.43         | 0.67        |

|                               |    |    |                 |           |             |             |
|-------------------------------|----|----|-----------------|-----------|-------------|-------------|
| dropped terms                 | 36 | 61 | habitat (urban) | 0.17±0.14 | 1.19        | 0.24        |
|                               | 36 | 61 | sex (male)      | 0.01±0.14 | -0.10       | 0.92        |
|                               | 36 | 61 | age (adult)     | 0.07±0.15 | -0.49       | 0.62        |
|                               | 36 | 61 | diet*habitat    | 0.42±0.28 | 1.52        | 0.14        |
| <b>Diet on Proteobacteria</b> | 36 | 61 | intercept       | 0.42±0.43 | -0.97       | 0.33        |
| Minimal model                 | 36 | 61 | insect diet     | 1.8±0.87  | <b>2.02</b> | <b>0.04</b> |
|                               | 36 | 61 | seed diet       | 0.19±0.66 | -0.28       | 0.78        |
|                               | 36 | 61 | age (mature)    | 1.05±0.57 | 1.84        | 0.07        |
| dropped terms                 | 36 | 61 | sex (male)      | -0.02±0.6 | -0.03       | 0.98        |
|                               | 36 | 61 | habitat (urban) | 0.35±0.57 | 0.61        | 0.54        |
|                               | 36 | 61 | diet*habitat    | 0.29±1.11 | -0.26       | 0.80        |
| <b>Diet on Bacteroidetes</b>  |    |    | intercept       | 6.23±0.30 | -20.60      | 0.00        |
| Minimal model                 | 36 | 61 | insect diet     | 1.32±0.59 | <b>2.25</b> | <b>0.03</b> |
|                               | 36 | 61 | seed diet       | 0.56±0.56 | 1.01        | 0.32        |
|                               | 36 | 61 | habitat (urban) | 0.82±0.46 | 1.80        | 0.08        |
| dropped terms                 | 36 | 61 | sex (male)      | 0.58±0.45 | 1.29        | 0.20        |
|                               | 36 | 61 | age (adult)     | 0.09±0.47 | 0.20        | 0.84        |
|                               | 36 | 61 | diet*habitat    | 1.54±0.92 | 1.68        | 1.00        |
| <b>Diet on Firmicutes</b>     |    |    | intercept       | 3.00±0.23 | -12.93      | 0.00        |
| minimal model                 | 36 | 61 | age (adult)     | 0.63±0.34 | -1.85       | 0.07        |
|                               | 36 | 61 | insect diet     | 0.39±0.42 | -0.92       | 0.37        |
| dropped terms                 | 36 | 61 | seed diet       | 0.15±0.40 | 0.39        | 0.70        |
|                               | 36 | 61 | habitat (urban) | 0.07±0.35 | 0.20        | 0.84        |
|                               | 36 | 61 | sex (male)      | 0.02±0.37 | 0.66        | 0.52        |
|                               | 36 | 61 | diet*habitat    | 1.16±0.69 | 1.69        | 0.10        |
| <b>Diet on Tenericutes</b>    |    |    | intercept       | 5.34±0.45 | -11.97      | 0.00        |
|                               | 36 | 61 | insect diet     | 0.24±0.80 | 0.30        | 0.15        |
|                               | 36 | 61 | seed diet       | 1.11±0.76 | 1.46        | 0.15        |
|                               | 36 | 61 | habitat (urban) | 0.01±0.74 | 0.02        | 0.99        |
|                               | 36 | 61 | sex (male)      | 1.16±0.71 | -1.63       | 0.12        |
|                               | 36 | 61 | age (adult)     | 0.15±0.74 | -0.20       | 0.84        |
|                               | 36 | 61 | diet*habitat    | 0.84±1.53 | -0.55       | 0.59        |
| <b>Diet on Actinobacteria</b> |    |    | intercept       | 0.00±0.00 | 1.18        | 0.24        |
|                               | 36 | 61 | insect diet     | 0.00±0.00 | 1.48        | 0.15        |
|                               | 36 | 61 | seed diet       | 0.00±0.00 | -0.53       | 0.60        |
|                               | 36 | 61 | habitat (urban) | 0.00±0.00 | -0.14       | 0.89        |
|                               | 36 | 61 | sex (male)      | 0.00±0.00 | 1.21        | 0.23        |
|                               | 36 | 61 | age (adult)     | 0.00±0.00 | 1.34        | 0.19        |
|                               | 36 | 61 | diet*habitat    | 0.00±0.00 | 1.04        | 0.30        |

Table S3. Genus-level differential abundance. P values are adjusted for False Discovery Rate (FDR). Values in dietary columns refer to mean relative abundance for each treatment.

| Genus            | P (FDR) | pre-dietary manipulation |       | post-dietary manipulation |       |
|------------------|---------|--------------------------|-------|---------------------------|-------|
|                  |         | insect                   | seed  | insect                    | seed  |
| Devosia          | <0.001  | 4.24                     | 6.48  | 1.93                      | 3.06  |
| Rickettsiella    | <0.001  | 4.18                     | 7.03  | 1.94                      | 6.95  |
| Cronobacter      | <0.001  | 7.72                     | 5.38  | 9.41                      | 2.58  |
| Rhizobium        | <0.001  | 4.09                     | 7.37  | 3.43                      | 4.67  |
| Sphingomonas     | <0.001  | 6.18                     | 7.33  | 3.84                      | 6.06  |
| Pantoea          | <0.01   | 7.9                      | 6.7   | 3.32                      | 7.2   |
| Arthrobacter     | <0.01   | 7.61                     | 6.18  | 4.61                      | 5.48  |
| Bradyrhizobium   | <0.01   | 6.88                     | 7.27  | 4.23                      | 4.67  |
| Microbacterium   | <0.01   | 3.68                     | 4.25  | 3.12                      | 6.31  |
| Lactobacillus    | <0.01   | 9.58                     | 9.16  | 11.51                     | 10.12 |
| Bacillus         | <0.01   | 4.37                     | 3.3   | 2.14                      | 5.41  |
| Staphylococcus   | <0.01   | 10.21                    | 9.86  | 7.07                      | 9.72  |
| Brevibacterium   | <0.01   | 8.22                     | 7.15  | 5.17                      | 7.41  |
| Candidatus       | <0.01   | 3.09                     | 2.92  | 6.24                      | 4.84  |
| Serratia         | <0.01   | 9.48                     | 7.74  | 9.28                      | 6.2   |
| Methylobacterium | <0.01   | 10.17                    | 11.75 | 14.04                     | 12.14 |
| Ureaplasma       | 0.016   | 9.3                      | 7.73  | 10.26                     | 10.71 |
| Brachy bacterium | 0.028   | 7.21                     | 5.37  | 4.98                      | 5.85  |
| Clostridium      | 0.032   | 6.02                     | 4.44  | 4.36                      | 4.02  |
| Rahnella         | 0.033   | 9.22                     | 8.31  | 7.84                      | 6.93  |
| Delftia          | 0.035   | 3.09                     | 3.28  | 4.78                      | 4.77  |
| Carnobacterium   | 0.04    | 5.08                     | 3.73  | 3.1                       | 3.58  |

Table S4. Natural variation in the gut microbiome on Day 1.

| Model                   | total observations | Fixed effects   | $\beta \pm SE$ | t-value | p     |
|-------------------------|--------------------|-----------------|----------------|---------|-------|
| <b>Chao1</b>            | 35                 | intercept       | 18.0±0.93      | 19.40   | <0.01 |
|                         |                    | PSP             | 1.32±1.59      | 0.83    | 0.41  |
|                         |                    | habitat (urban) | 0.53±1.6       | 0.34    | 0.74  |
|                         |                    | sex (male)      | 1.20±1.55      | -0.78   | 0.44  |
|                         |                    | age (adult)     | 1.65±1.54      | 1.07    | 0.29  |
| <b>Shannon's index</b>  |                    | intercept       | 2.72±0.22      | 12.1    | <0.01 |
|                         |                    | PSP             | 0.59±0.38      | 1.54    | 0.13  |
|                         |                    | habitat (urban) | 0.17±0.39      | 0.45    | 0.66  |
|                         |                    | sex (male)      | 0.01±0.38      | 0.02    | 0.98  |
|                         |                    | age (adult)     | 0.20±0.37      | 1.09    | 0.28  |
| <b>observed species</b> | 35                 | intercept       | 0.19±0.21      | 44.50   | <0.01 |
|                         |                    | PSP             | 0.19±0.21      | 0.91    | 0.37  |
|                         |                    | habitat (urban) | 0.17±0.20      | 0.85    | 0.40  |
|                         |                    | sex (male)      | 0.10±0.20      | -0.50   | 0.62  |
|                         |                    | age (adult)     | 0.18±0.20      | 0.87    | 0.39  |

|                       |    |                 |   |           |             |             |
|-----------------------|----|-----------------|---|-----------|-------------|-------------|
| <b>Proteobacteria</b> | 35 | intercept       | - | 0.37±0.56 | -0.66       | 0.51        |
|                       |    | PSP             | - | 0.40±0.76 | -0.53       | 0.60        |
|                       |    | age (mature)    | - | 1.27±0.73 | 1.75        | 0.08        |
|                       |    | sex (male)      | - | 0.14±0.78 | 0.18        | 0.86        |
|                       |    | habitat (urban) | - | 0.54±0.75 | -0.72       | 0.47        |
| <b>Bacteroidetes</b>  | 35 | intercept       | - | 6.97±0.44 | -15.77      | <0.01       |
|                       |    | PSP             | - | 0.84±0.58 | 1.44        | 0.16        |
|                       |    | habitat (urban) | - | 1.01±0.55 | 1.82        | 0.08        |
|                       |    | sex (male)      | - | 0.44±0.57 | 0.76        | 0.45        |
|                       |    | age (adult)     | - | 0.65±0.56 | 1.15        | 0.26        |
| <b>Firmicutes</b>     | 35 | intercept       | - | 3.22±0.27 | -11.97      | <0.01       |
|                       |    | PSP             | - | 0.02±0.46 | 0.05        | 0.96        |
|                       |    | habitat (urban) | - | 0.26±0.45 | 0.57        | 0.57        |
|                       |    | sex (male)      | - | 0.01±0.45 | 0.02        | 0.99        |
|                       |    | age (adult)     | - | 0.48±0.44 | -1.07       | 0.29        |
| <b>Tenericutes</b>    | 35 | intercept       | - | 5.40±0.51 | -10.60      | <0.01       |
|                       |    | PSP             | - | 0.26±0.87 | 0.30        | 0.77        |
|                       |    | habitat (urban) | - | 0.34±0.85 | -0.40       | 0.69        |
|                       |    | sex (male)      | - | 0.87±0.84 | -1.04       | 0.31        |
|                       |    | age (adult)     | - | 0.28±0.85 | 0.33        | 0.74        |
| <b>Actinobacteria</b> | 35 | intercept       | - | 0.00±0.00 | 0.59        | 0.56        |
|                       |    | PSP             | - | 0.00±0.00 | -0.06       | 0.96        |
|                       |    | habitat (urban) | - | 0.00±0.00 | <b>2.47</b> | <b>0.02</b> |
|                       |    | sex (male)      | - | 0.00±0.00 | 0.47        | 0.64        |
|                       |    | age (adult)     | - | 0.00±0.00 | 1.95        | 0.06        |

Table S5. Beta diversity metrics for (a) natural variation (Day 1); and (b) dietary manipulation. PSP = Problem Solving Performance.

| Model                               | Factor  | Bray-curtis       | Jaccard           | Weighted unfrac    | Unweighted unfrac  |
|-------------------------------------|---------|-------------------|-------------------|--------------------|--------------------|
| a) Natural variation (Day1)         | PSP     | R2=0.03, p=0.52   | R2=0.03, p=0.40   | R2=0.02, p = 0.57  | R2=0.05, p = 0.07  |
|                                     | habitat | R2=0.04, p =0.07  | R2=0.04, p = 0.09 | R2= 0.06, p = 0.09 | R2= 0.04, p = 0.09 |
|                                     | sex     | R2=0.03, p=0.43   | R2=0.03, p =0.40  | R2=0.02, p =0.73   | R=0.02, p =0.74    |
|                                     | age     | R2=0.03, p=0.32   | R2=0.03, p=0.30   | R2=0.04, p =0.14   | R=0.04, p =0.13    |
| b) Dietary manipulation (Day 1 &12) | diet    | R2=0.07, p =<0.01 | R2=0.06, p <0.01  | R2= 0.12, p<0.01   | R2=0.07, p <0.01   |
|                                     | PSP     | R2=0.02, p=0.09   | R2=0.02, p = 1.1  | R=0.01, p = 0.77   | R2= 0.04, p = 0.02 |
|                                     | habitat | R2=0.04, p<0.01   | R2=0.03, p<0.01   | R2=0.05, p=0.01    | R2=0.02, p=0.18    |
|                                     | sex     | R2=0.02, p=0.31   | R2=0.02, p=0.35   | R2=0.02, p =0.20   | R=0.01, p =0.92    |
|                                     | age     | R=0.02, p=0.15    | R2=0.02, p=0.17   | R2=0.03, p =0.04   | R20.02, p =0.38    |
